# Supplementary material for: Comparative Analysis of Primers Used for 16S rRNA Gene Sequencing in Oral Microbiome Studies
Source: MDPI journal article supplement (doi:10.3390/mps6040071), 2023-08-06
Supplement: s1 [file s1]

## Supplementary Table

Supplementary Table S1. Summary of amplicon classification

|       | Unclassified<br>amplicons | Unclassified % | Mismatch | Mismatch % |
|-------|---------------------------|----------------|----------|------------|
| V1-V2 | 48                        | 5.10           | 1        | 0.11       |
| V1-V3 | 27                        | 4.57           | 1        | 0.17       |
| V3-V4 | 175                       | 18.36          | 8        | 0.84       |
| V4-V5 | 255                       | 27.21          | 13       | 1.39       |
| V5-V7 | 149                       | 22.54          | 8        | 1.21       |
| V6-V8 | 134                       | 23.22          | 2        | 0.35       |

Supplementary Table S2. Characterization of clinical samples

| Sex           | Age            | Sampling Site        |
|---------------|----------------|----------------------|
| Male (n=15)   | 67.7 $\pm$ 8.3 | Buccal (n=35)        |
| Female (n=22) | 67.8 $\pm$ 8.0 | Supragingival (n=35) |
